# Supplementary material for: Self-Assembled DNA Nanocarriers for Treating Bone Fracture and Surgery-related MRSA Infection
Source: Research Square preprint supplement (doi:10.21203/rs.3.rs-5049190/v1), 2025-02-06
Supplement: Supplementary file 1 [file bea62474277f320add93da13.docx]

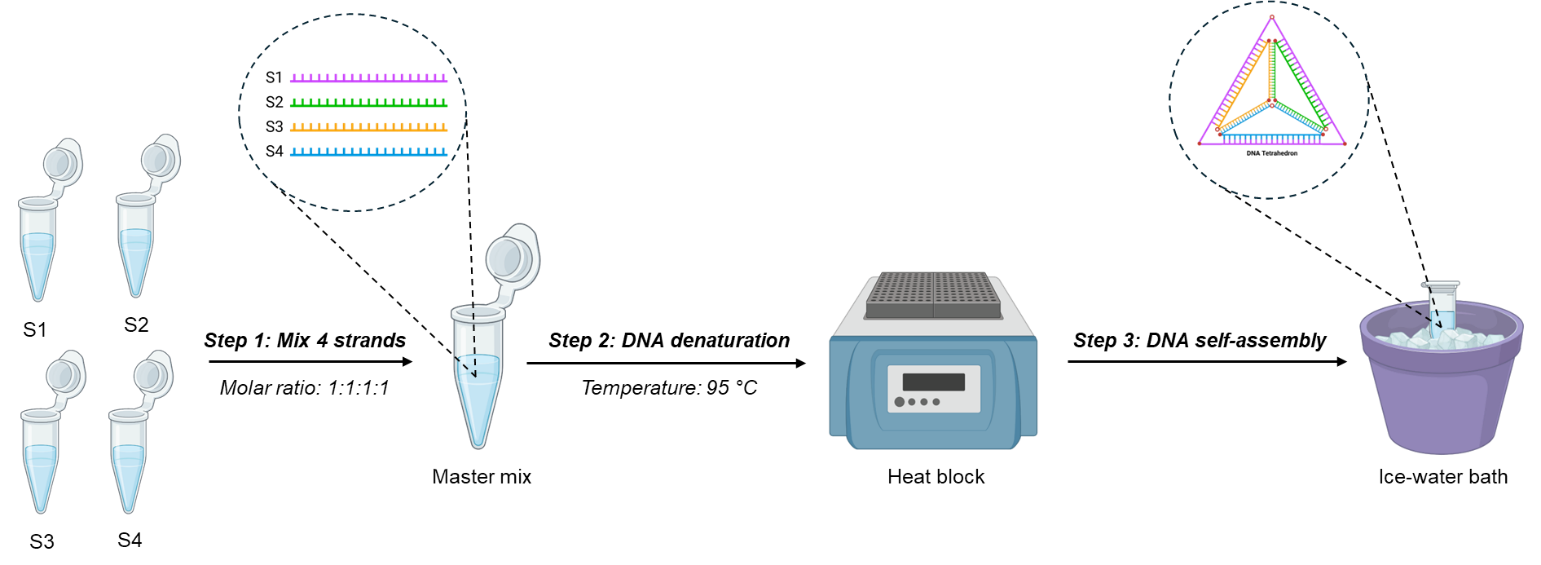


Fig. S1 | Schematic diagram showing the laboratory procedures of synthesizing TDN.


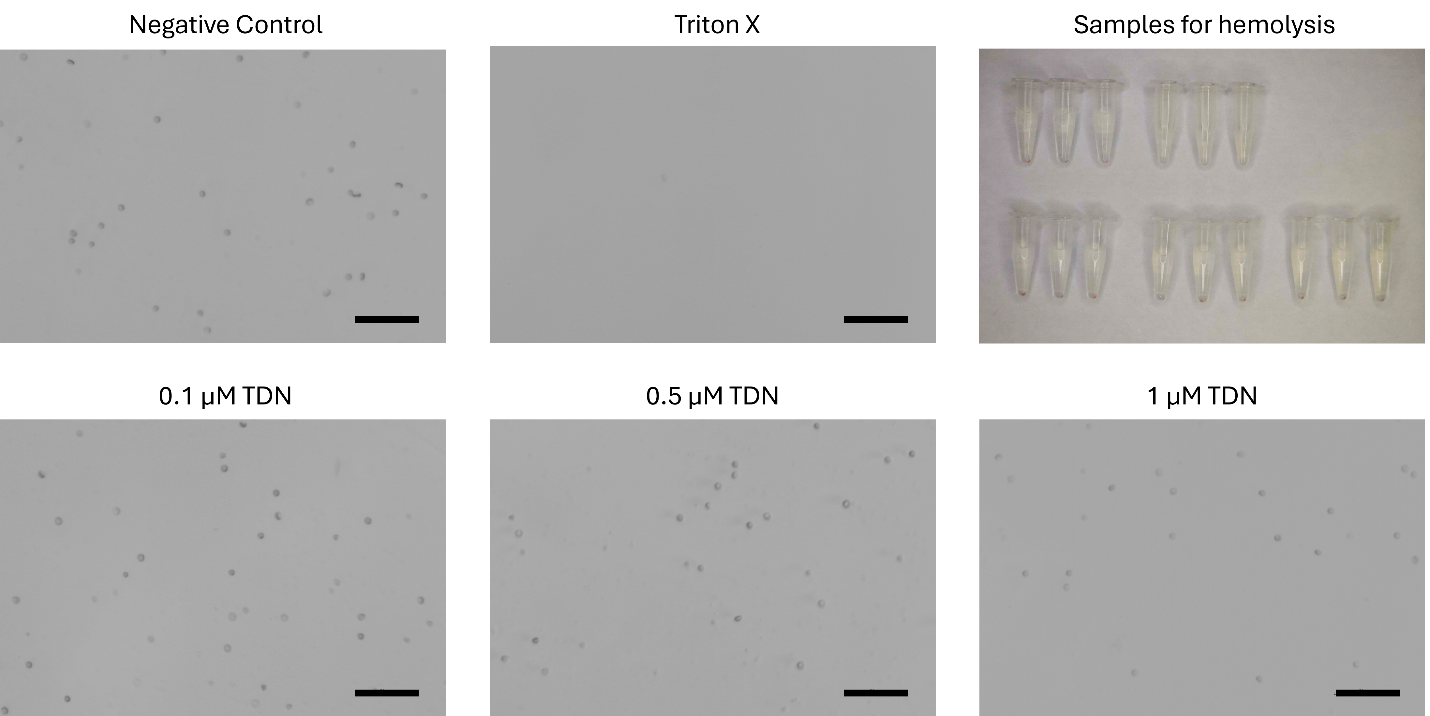


Fig. S2 | Phase-contrast images of mRBCs following the incubation with PBS (negative control), Triton-X 100 (positive control), 0.1 μm TDN, 0.5 μm TDN, 1 μm TDN. Scale bar 50 μm.


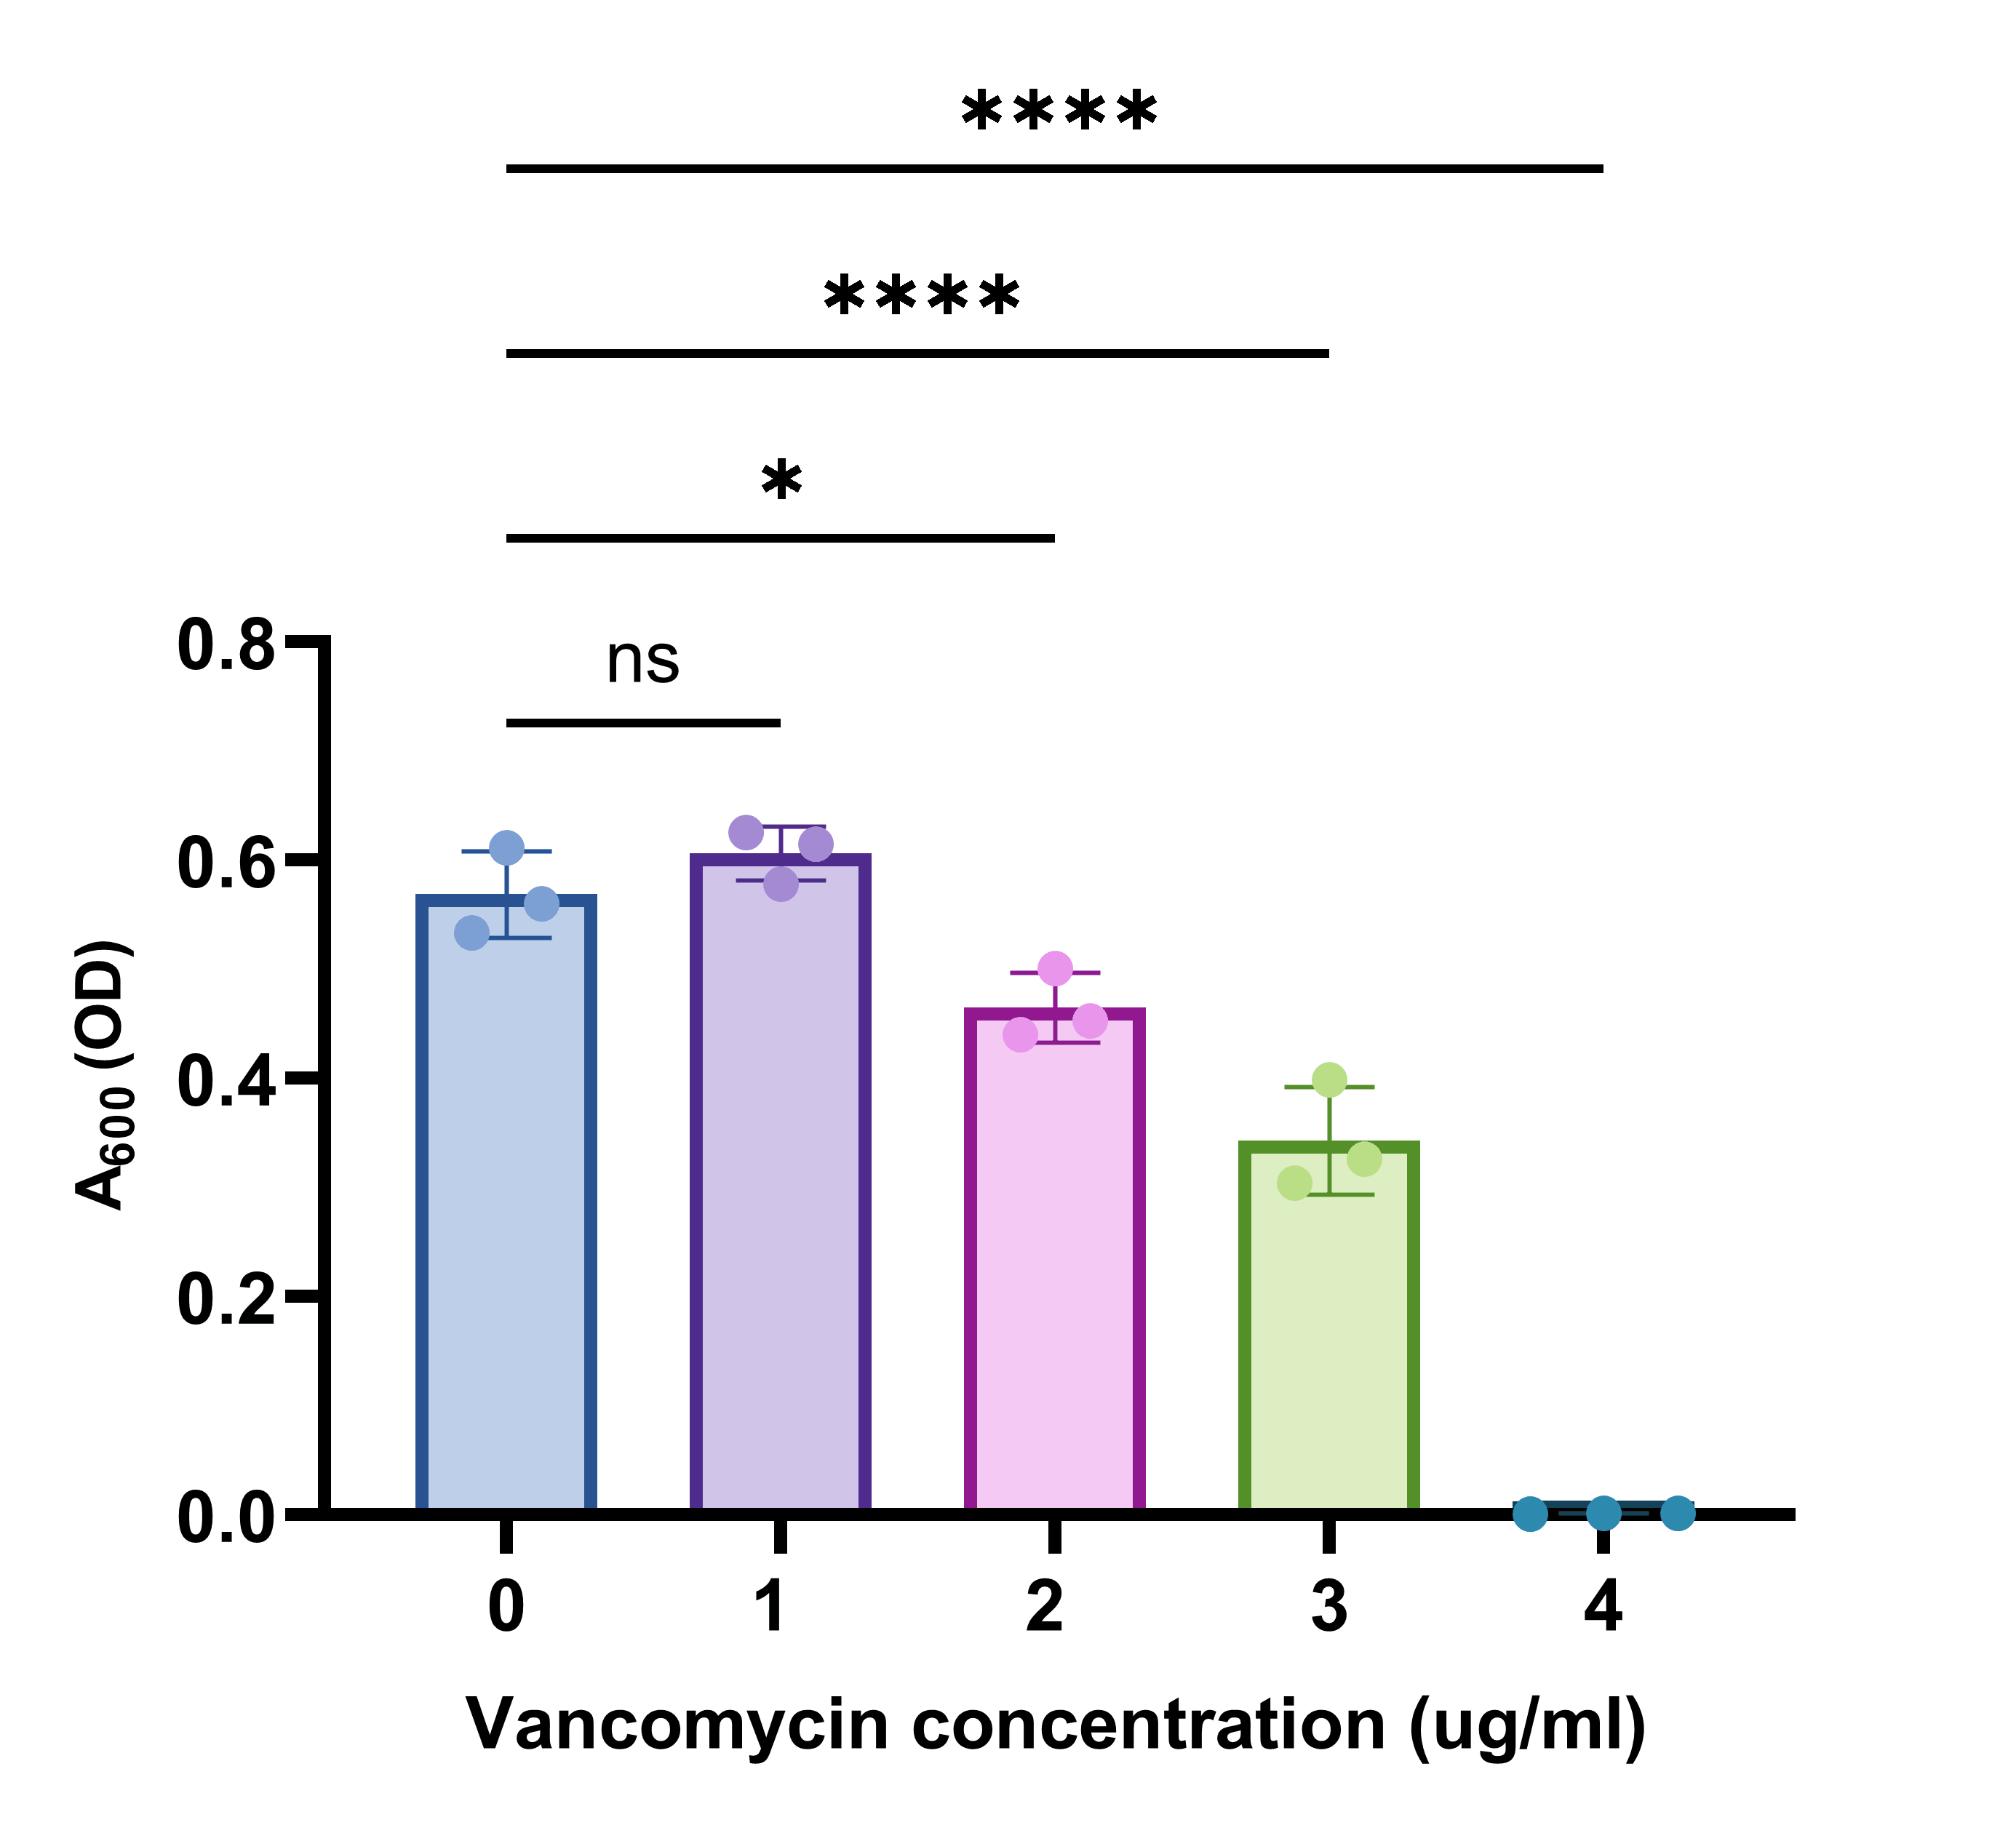


Fig. S3 | MIC test of vancomycin against MRSA.
